# Supplementary material
Source: publisher figshare collection journal article supplement (https://acs.figshare.com/ndownloader/files/4105492)
Supplement: Supplementary file 1 [file 4105492]

**Table S1. Summary of identified proteins.** Purified fibrinogen was analyzed by SDS-PAGE and visible protein bands after Coomassie G-250 staining (see **Figure 1**) were in-gel digested using trypsin. Tryptic digests were analyzed using nanoLC-ESI-ion trap-MS/MS and data were searched against the human IPI database using the Mascot search algorithm. Only peptides with a score above 30 were accepted and only proteins with at least two unique peptides were considered. Fibrinogen subunits were identified in multiple different bands and the data reflect the overall coverage and peptides observed. Keratin hits were removed. Protein\_Cover: total protein coverage observed using only peptides with score above 30. Pept\_total: total number of peptides (score >30). Pept\_uniq: total number of unique peptides (score >30). Fib 1, batch 1 of fibrinogen, Fib 2, batch 2 of fibrinogen.

| Sample       | Protein_Name                 | Protein_ID  | Protein_Cover | Pept_total | Pept_uniq |
|--------------|------------------------------|-------------|---------------|------------|-----------|
| <b>Fib 1</b> |                              |             |               |            |           |
|              | FGA Fibrinogen alpha chain   | IPI00029717 | 51            | 482        | 43        |
|              | FGB Fibrinogen beta chain    | IPI00298497 | 62            | 153        | 45        |
|              | FGG Fibrinogen gamma chain   | IPI00021891 | 69            | 237        | 32        |
|              | FN1 Fibronectin              | IPI00022418 | 9             | 37         | 16        |
|              | ALB Serum albumin            | IPI00384697 | 20            | 5          | 5         |
|              | F13B Coagulation factor XIII | IPI00007240 | 8             | 14         | 5         |
|              | C4A Complement C4-A          | IPI00032258 | 4             | 6          | 4         |
|              | IGHA1 CDNA FLJ25298          | IPI00386524 | 7             | 3          | 3         |
|              | IGHM FLJ00385 protein        | IPI00168728 | 5             | 2          | 2         |
|              | VWF von Willebrand factor    | IPI00023014 | 1             | 2          | 2         |
| <b>Fib 2</b> |                              |             |               |            |           |
|              | FGA Fibrinogen alpha chain   | IPI00029717 | 47            | 504        | 40        |
|              | FGB Fibrinogen beta chain    | IPI00298497 | 59            | 152        | 40        |

|                              |             |    |     |    |
|------------------------------|-------------|----|-----|----|
| FGG Fibrinogen gamma chain   | IPI00021891 | 67 | 272 | 34 |
| FBLN1 Fibulin-1              | IPI00296534 | 28 | 48  | 25 |
| A2M Alpha-2-macroglobulin    | IPI00478003 | 9  | 27  | 12 |
| C3 Complement C3             | IPI00783987 | 9  | 14  | 9  |
| ALB Serum albumin            | IPI00216773 | 16 | 13  | 6  |
| FN1 Fibronectin              | IPI00022418 | 2  | 5   | 5  |
| F13B Coagulation factor XIII | IPI00007240 | 5  | 6   | 3  |
| IGHA1 CDNA FLJ25298          | IPI00386524 | 8  | 4   | 3  |
| C4A Complement C4-A          | IPI00032258 | 2  | 2   | 2  |
| CFH Complement factor H      | IPI00029739 | 2  | 2   | 2  |

---
